# Supplementary material for: Trophic Positions of Sympatric Copepods across the Subpolar Front of the East Sea during Spring: A Stable Isotope Approach
Source: MDPI journal article supplement (doi:10.3390/w15030416), 2023-01-19
Supplement: s1 [file s1]

## Supplementary materials

**Table S1.** Numerical abundance (ind. m<sup>-3</sup>) of copepods in the East Sea.

**Table S2.** C/N ratio, stable carbon ( $\delta^{13}\text{C}$ ) and nitrogen ( $\delta^{15}\text{N}$ ) isotope ratios of food sources and copepods in the south region of the subpolar front of the East Sea.

**Table S3.** C/N ratio, stable carbon ( $\delta^{13}\text{C}$ ) and nitrogen ( $\delta^{15}\text{N}$ ) isotope ratios of food sources and copepods in the north region of the subpolar front of the East Sea.

**Table S4.** Conover post hoc test results for pair-wise differences in  $\delta^{13}\text{C}$  and  $\delta^{15}\text{N}$  values among pico- to micro-POMs within the ~200-m depth layer (a) and among 11 copepods (b), *Calanus sinicus*, *Clausocalanus pergens*, *Ctenocalanus vanus*, *Mesocalanus tenuicornis*, *Metridia pacifica*, *Neocalanus plumchrus*, *Paracalanus parvus* s. l., *Pseudocalanus newmani*, *Scolecithricella minor*, *Corycaeus affinis*, *Oithona atlantica*, and *Triconia conifera* in the south region of the subpolar front of the East Sea.

**Table S5.** Conover post hoc test results for pair-wise differences in  $\delta^{13}\text{C}$  and  $\delta^{15}\text{N}$  values among pico- to micro-POMs within the ~200-m depth layer (a) and among nine copepods (b), *Eucalanus bungii*, *Metridia pacifica*, *Microcalanus pygmaeus*, *Pseudocalanus minutus*, *P. newmani*, *Neocalanus cristatus*, *N. plumchrus*, *Scolecithricella minor*, and *Oithona atlantica* in the north region of the subpolar front of the East Sea.

Table S1

| Species                        | Station |       |       |       |       |       |
|--------------------------------|---------|-------|-------|-------|-------|-------|
|                                | M4      | M7    | M8    | M12   | M13   | M15   |
| <b>Calanoida</b>               |         |       |       |       |       |       |
| Acartiidae                     |         |       |       |       |       |       |
| <i>Acartia omorii</i>          | 0.59    |       |       |       |       |       |
| Aetideidae                     |         |       |       |       |       |       |
| <i>Gaetanus minor</i>          |         | 0.38  | 0.58  | 0.19  |       | 0.23  |
| Candaciidae                    |         |       |       |       |       |       |
| <i>Candacia bipinata</i>       | 0.20    |       | 0.58  |       |       |       |
| Calanidae                      |         |       |       |       |       |       |
| <i>Calanus sinicus</i>         | 0.20    | 1.71  | 2.57  | 0.10  |       |       |
| <i>Mesocalanus tenuicornis</i> | 36.57   |       | 10.74 | 0.10  |       |       |
| <i>Neocalanus cristatus</i>    |         | 0.19  | 0.35  | 0.96  | 1.04  | 2.30  |
| <i>Neocalanus plumchrus</i>    | 15.25   | 3.23  | 4.67  | 35.17 | 16.96 | 40.44 |
| Clausocalanidae                |         |       |       |       |       |       |
| <i>Ctenocalanus vanus</i>      | 1.37    | 0.19  | 0.35  |       |       |       |
| <i>Clausocalanus pergens</i>   | 4.89    | 3.61  | 1.63  |       |       |       |
| <i>Microcalanus pygmaeus</i>   | 1.37    |       | 0.70  | 0.58  | 0.87  | 1.38  |
| <i>Pseudocalanus newmani</i>   | 15.45   | 89.30 | 25.21 | 2.88  | 3.81  | 11.03 |
| <i>Pseudocalanus minutus</i>   | 0.20    |       |       | 5.29  | 5.89  | 21.37 |
| Eucalanidae                    |         |       |       |       |       |       |
| <i>Eucalanus bungii</i>        | 0.39    |       |       | 1.54  | 1.21  | 0.46  |
| Euchaetidae                    |         |       |       |       |       |       |
| <i>Paraeuchaeta elongata</i>   | 1.76    | 1.90  | 3.38  | 2.59  | 1.04  | 3.91  |
| Lucicutiidae                   |         |       |       |       |       |       |
| <i>Lucicutia flavicornis</i>   | 0.20    | 0.38  |       |       |       |       |
| Metridinidae                   |         |       |       |       |       |       |
| <i>Metridia pacifica</i>       | 42.05   | 82.27 | 35.94 | 10.57 | 25.27 | 23.67 |
| Paracalanidae                  |         |       |       |       |       |       |
| <i>Paracalanus parvus</i> s.l. | 5.67    | 0.38  | 3.03  |       |       |       |
| Scolecithrichidae              |         |       |       |       |       |       |
| <i>Scolecithricella minor</i>  | 2.54    | 2.66  | 4.43  | 2.31  | 4.85  | 8.96  |
| <b>Cyclopoida</b>              |         |       |       |       |       |       |
| Oithonidae                     |         |       |       |       |       |       |
| <i>Oithona atlantica</i>       | 183.65  | 42.94 | 29.76 | 0.67  | 3.12  | 3.45  |
| Poecilostomatoida              |         |       |       |       |       |       |
| Corycaeidae                    |         |       |       |       |       |       |
| <i>Croycaeus affinis</i>       | 7.43    | 1.90  | 9.45  |       |       |       |
| Oncaeidae                      |         |       |       |       |       |       |
| <i>Triconia conifera</i>       | 1.76    | 1.33  |       |       |       |       |
| <i>Oncaea venusta</i>          | 0.20    | 0.38  | 0.12  |       |       |       |
| <i>Oncaea mediterranea</i>     | 0.59    | 2.28  |       |       |       |       |

**Table S2.**

|                                 | Prosome Length | N  | C/N ratio |      | $\delta^{13}\text{C}$ |      | $\delta^{15}\text{N}$ |      |
|---------------------------------|----------------|----|-----------|------|-----------------------|------|-----------------------|------|
|                                 |                |    | Mean      | SD   | Mean                  | SD   | Mean                  | SD   |
| Surface layer                   |                |    |           |      |                       |      |                       |      |
| Pico-POM                        |                | 6  | 7.26      | 1.26 | −25.52                | 0.74 | 3.03                  | 0.35 |
| Nano-POM                        |                | 6  | 6.70      | 0.22 | −24.02                | 0.33 | 3.70                  | 0.61 |
| Micro-POM                       |                | 6  | 9.37      | 0.89 | −21.75                | 0.69 | 4.88                  | 1.27 |
| Subsurface maximum layer        |                |    |           |      |                       |      |                       |      |
| Pico-POM                        |                | 3  | 4.70      | 0.17 | −24.67                | 0.27 | 1.68                  | 0.87 |
| Nano-POM                        |                | 3  | 7.05      | 0.42 | −23.59                | 1.31 | 2.07                  | 0.26 |
| Micro-POM                       |                | 3  | 7.05      | 1.27 | −22.90                | 0.45 | 4.35                  | 0.40 |
| 100-m depth layer               |                |    |           |      |                       |      |                       |      |
| Pico-POM                        |                | 3  | 9.57      | 0.66 | −25.34                | 1.43 | 6.15                  | 0.53 |
| Nano-POM                        |                | 3  | 6.31      | 0.76 | −24.29                | 0.54 | 5.65                  | 0.31 |
| Micro-POM                       |                | 3  | 6.70      | 0.55 | −23.94                | 0.86 | 7.62                  | 0.67 |
| 200-m depth layer               |                |    |           |      |                       |      |                       |      |
| Pico-POM                        |                | 3  | 9.64      | 1.73 | −25.47                | 1.39 | 7.27                  | 0.44 |
| Nano-POM                        |                | 3  | 6.33      | 0.76 | −23.17                | 0.47 | 5.53                  | 1.04 |
| Micro-POM                       |                | 3  | 9.52      | 0.92 | −24.17                | 0.78 | 9.76                  | 0.39 |
| Calanoida                       |                |    |           |      |                       |      |                       |      |
| <i>Calanus sinicus</i>          | 2.21           | 11 | 3.38      | 0.04 | −22.03                | 0.53 | 7.45                  | 0.68 |
| <i>Clausocalanus pergens</i>    | 0.69           | 5  | 3.39      | 0.02 | −23.29                | 0.12 | 5.47                  | 0.25 |
| <i>Ctenocalanus vanus</i>       | 0.86           | 5  | 3.37      | 0.07 | −23.32                | 0.19 | 4.36                  | 0.31 |
| <i>Mesocalanus tenuicornis</i>  | 1.85           | 5  | 3.42      | 0.02 | −22.94                | 0.08 | 6.80                  | 0.55 |
| <i>Metridia pacifica</i>        | 2.08           | 5  | 3.39      | 0.04 | −22.57                | 0.68 | 6.25                  | 0.23 |
| <i>Neocalanus plumchrus</i>     | 3.60           | 5  | 3.56      | 0.03 | −21.17                | 0.22 | 9.77                  | 0.48 |
| <i>Paracalanus parvus</i> s. l. | 0.68           | 5  | 3.41      | 0.01 | −22.65                | 0.16 | 6.16                  | 0.22 |
| <i>Pseudocalanus newmani</i>    | 0.78           | 5  | 3.34      | 0.02 | −23.39                | 0.18 | 6.26                  | 0.22 |
| Cyclopoida                      |                |    |           |      |                       |      |                       |      |
| <i>Corycaeus affinis</i>        | 0.73           | 5  | 3.46      | 0.05 | −22.45                | 0.32 | 6.26                  | 0.27 |
| <i>Oithona atlantica</i>        | 0.71           | 5  | 3.29      | 0.02 | −23.23                | 0.05 | 5.21                  | 0.16 |
| <i>Triconia conifera</i>        | 0.66           | 5  | 3.51      | 0.01 | −23.60                | 0.01 | 4.36                  | 0.37 |

**Table S3.**

|                               | Prosome<br>Length | N | C/N ratio |      | $\delta^{13}\text{C}$ |      | $\delta^{15}\text{N}$ |      |
|-------------------------------|-------------------|---|-----------|------|-----------------------|------|-----------------------|------|
|                               |                   |   | Mean      | SD   | Mean                  | SD   | Mean                  | SD   |
| Surface layer                 |                   |   |           |      |                       |      |                       |      |
| Pico-POM                      |                   | 6 | 5.23      | 1.76 | -25.35                | 0.42 | -0.65                 | 0.30 |
| Nano-POM                      |                   | 6 | 7.11      | 0.82 | -23.94                | 0.30 | 3.10                  | 0.52 |
| Micro-POM                     |                   | 6 | 11.09     | 1.50 | -21.27                | 0.67 | 6.18                  | 0.67 |
| Subsurface maximum layer      |                   |   |           |      |                       |      |                       |      |
| Pico-POM                      |                   | 3 | 8.83      | 2.42 | -25.44                | 0.47 | 1.27                  | 0.14 |
| Nano-POM                      |                   | 3 | 12.42     | 0.92 | -23.59                | 0.26 | 3.03                  | 0.60 |
| Micro-POM                     |                   | 3 | 15.76     | 0.32 | -19.41                | 0.21 | 5.33                  | 0.92 |
| 100-m depth layer             |                   |   |           |      |                       |      |                       |      |
| Pico-POM                      |                   | 3 | 11.20     | 1.51 | -24.19                | 0.15 | 5.52                  | 1.11 |
| Nano-POM                      |                   | 3 | 8.49      | 0.39 | -22.55                | 0.29 | 4.96                  | 0.91 |
| Micro-POM                     |                   | 3 | 15.04     | 1.24 | -24.11                | 0.22 | 6.88                  | 0.24 |
| 200-m depth layer             |                   |   |           |      |                       |      |                       |      |
| Pico-POM                      |                   | 3 | 7.38      | 1.70 | -26.29                | 0.36 | 6.82                  | 0.82 |
| Nano-POM                      |                   | 3 | 12.58     | 1.49 | -23.82                | 0.15 | 5.16                  | 0.81 |
| Micro-POM                     |                   | 3 | 11.06     | 2.38 | -24.48                | 1.37 | 10.17                 | 0.47 |
| Calanoida                     |                   |   |           |      |                       |      |                       |      |
| <i>Eucalanus bungii</i>       | 6.40              | 5 | 3.53      | 0.05 | -20.65                | 0.31 | 5.86                  | 0.28 |
| <i>Metridia pacifica</i>      | 2.08              | 5 | 3.39      | 0.04 | -23.11                | 0.39 | 5.18                  | 0.22 |
| <i>Microcalanus pygmaeus</i>  | 0.66              | 5 | 3.72      | 0.13 | -22.31                | 0.14 | 9.30                  | 0.07 |
| <i>Neocalanus cristatus</i>   | 6.82              | 5 | 3.30      | 0.02 | -22.06                | 0.23 | 4.58                  | 0.49 |
| <i>Neocalanus plumchrus</i>   | 3.60              | 5 | 3.63      | 0.07 | -20.25                | 0.30 | 6.28                  | 0.42 |
| <i>Pseudocalanus minutus</i>  | 1.28              | 5 | 4.22      | 0.03 | -21.66                | 0.45 | 6.47                  | 0.67 |
| <i>Pseudocalanus newmani</i>  | 0.78              | 5 | 3.80      | 0.14 | -22.64                | 0.41 | 5.02                  | 0.57 |
| <i>Scolecithricella minor</i> | 0.99              | 5 | 4.17      | 0.36 | -22.77                | 0.50 | 8.05                  | 0.68 |
| Cyclopoida                    |                   |   |           |      |                       |      |                       |      |
| <i>Oithona atlantica</i>      | 0.71              | 5 | 3.47      | 0.16 | -22.81                | 0.37 | 7.21                  | 0.59 |

Table S4.

| (a)                    | Surface Pico      | Surface Nano      | Surface Micro   | SCM Pico              | SCM Nano           | SCM Micro           | 100-m Pico             | 100-m Nano        | 100-m Micro       | 200-m Pico          | 200-m Nano |
|------------------------|-------------------|-------------------|-----------------|-----------------------|--------------------|---------------------|------------------------|-------------------|-------------------|---------------------|------------|
| Surface Nano           | **/*              |                   |                 |                       |                    |                     |                        |                   |                   |                     |            |
| Surface Micro          | **/**             | **/ns             |                 |                       |                    |                     |                        |                   |                   |                     |            |
| SCM Pico               | /*                | /*                | /*              |                       |                    |                     |                        |                   |                   |                     |            |
| SCM Nano               | /*                | ns/*              | ns/*            | ns/ns                 |                    |                     |                        |                   |                   |                     |            |
| SCM Micro              | /*                | */ns              | */ns            | /*                    | ns/*               |                     |                        |                   |                   |                     |            |
| 100-m Pico             | ns/*              | ns/*              | */ns            | ns/*                  | ns/*               | /*                  |                        |                   |                   |                     |            |
| 100-m Nano             | /*                | ns/*              | */ns            | ns/*                  | ns/*               | /*                  | ns/ns                  |                   |                   |                     |            |
| 100-m Micro            | /*                | ns/*              | /*              | ns/*                  | ns/*               | /*                  | ns/*                   | ns/*              |                   |                     |            |
| 200-m Pico             | ns/*              | ns/*              | /*              | ns/*                  | ns/*               | /*                  | ns/*                   | ns/*              | ns/*              |                     |            |
| 200-m Nano             | /*                | ns/*              | */ns            | /*                    | ns/*               | ns/*                | ns/*                   | */ns              | ns/*              | ns/*                |            |
| 200-m Micro            | /*                | ns/*              | /*              | /*                    | ns/*               | /*                  | ns/*                   | ns/*              | ns/*              | */ns                | ns/*       |
| (b)                    | <i>C. sinicus</i> | <i>C. pergens</i> | <i>C. vanus</i> | <i>M. tenuicornis</i> | <i>M. pacifica</i> | <i>N. plumchrus</i> | <i>P. parvus</i> s. l. | <i>P. newmani</i> | <i>C. affinis</i> | <i>O. atlantica</i> |            |
| <i>C. pergens</i>      | **/**             |                   |                 |                       |                    |                     |                        |                   |                   |                     |            |
| <i>C. vanus</i>        | **/**             | ns/**             |                 |                       |                    |                     |                        |                   |                   |                     |            |
| <i>M. tenuicornis</i>  | **/ns             | **/**             | **/**           |                       |                    |                     |                        |                   |                   |                     |            |
| <i>M. pacifica</i>     | /**               | **/**             | **/**           | **/ns                 |                    |                     |                        |                   |                   |                     |            |
| <i>N. plumchrus</i>    | **/**             | **/**             | **/**           | **/**                 | **/**              |                     |                        |                   |                   |                     |            |
| <i>P. parvus</i> s. l. | /**               | **/**             | **/**           | */ns                  | ns/*               | **/**               |                        |                   |                   |                     |            |
| <i>P. newmani</i>      | **/**             | ns/**             | ns/**           | **/ns                 | **/*               | **/**               | **/ns                  |                   |                   |                     |            |
| <i>C. affinis</i>      | ns/**             | **/**             | **/**           | */ns                  | ns/ns              | **/**               | ns/ns                  | **/ns             |                   |                     |            |
| <i>O. atlantica</i>    | **/**             | ns/ns             | ns/**           | **/**                 | **/**              | **/**               | **/**                  | ns/**             | **/**             |                     |            |
| <i>T. conifera</i>     | **/**             | **/**             | **/ns           | **/**                 | **/**              | **/**               | **/**                  | ns/**             | **/**             | **/**               |            |

Each cell of the table includes the results for  $\delta^{13}\text{C}$  and  $\delta^{15}\text{N}$  ( $\delta^{13}\text{C}/\delta^{15}\text{N}$ , respectively).

\* $\leq 0.05$ ; \*\* $\leq 0.01$ ; \*\*\* $\leq 0.001$ ; ns, not significant ( $p > 0.05$ ).

**Table S5.**

| (a)                 | Surface Pico     | Surface Nano       | Surface Micro      | SCM Pico          | SCM Nano          | SCM Micro           | 100-m Pico          | 100-m Nano      | 100-m Micro | 200-m Pico | 200-m Nano |
|---------------------|------------------|--------------------|--------------------|-------------------|-------------------|---------------------|---------------------|-----------------|-------------|------------|------------|
| Surface Nano        | */**             |                    |                    |                   |                   |                     |                     |                 |             |            |            |
| Surface Micro       | */**             | */**               |                    |                   |                   |                     |                     |                 |             |            |            |
| SCM Pico            | ns/*             | /*                 | /*                 |                   |                   |                     |                     |                 |             |            |            |
| SCM Nano            | /*               | ns/ns              | /*                 | /*                |                   |                     |                     |                 |             |            |            |
| SCM Micro           | /*               | /*                 | */ns               | /*                | /*                |                     |                     |                 |             |            |            |
| 100-m Pico          | /*               | ns/*               | */ns               | /*                | /*                | */ns                |                     |                 |             |            |            |
| 100-m Nano          | /*               | /*                 | */ns               | /*                | /*                | */ns                | */ns                |                 |             |            |            |
| 100-m Micro         | /*               | ns/*               | */ns               | /*                | /*                | /*                  | ns/*                | /*              |             |            |            |
| 200-m Pico          | /*               | /*                 | */ns               | ns/*              | /*                | */ns                | */ns                | */ns            | */ns        |            |            |
| 200-m Nano          | /*               | ns/*               | */ns               | /*                | ns/*              | */ns                | */ns                | */ns            | ns/*        | /*         |            |
| 200-m Micro         | ns/*             | ns/*               | /*                 | ns/*              | ns/*              | /*                  | ns/*                | /*              | ns/*        | /*         | ns/*       |
| (b)                 | <i>E. bungii</i> | <i>M. pacifica</i> | <i>M. pygmaeus</i> | <i>P. minutus</i> | <i>P. newmani</i> | <i>N. cristatus</i> | <i>N. plumchrus</i> | <i>S. minor</i> |             |            |            |
| <i>M. pacifica</i>  | */**             |                    |                    |                   |                   |                     |                     |                 |             |            |            |
| <i>M. pygmaeus</i>  | */**             | */**               |                    |                   |                   |                     |                     |                 |             |            |            |
| <i>P. minutus</i>   | */ns             | */**               | */**               |                   |                   |                     |                     |                 |             |            |            |
| <i>P. newmani</i>   | */*              | ns/ns              | ns/**              | /*                |                   |                     |                     |                 |             |            |            |
| <i>N. cristatus</i> | /*               | */ns               | ns/**              | */ns              | ns/**             |                     |                     |                 |             |            |            |
| <i>N. plumchrus</i> | ns/ns            | */**               | */**               | */ns              | */**              | */**                |                     |                 |             |            |            |
| <i>S. minor</i>     | */**             | ns/**              | ns/**              | /*                | ns/**             | */**                | */**                |                 |             | */**       |            |
| <i>O. atlantica</i> | */**             | ns/**              | */**               | */ns              | ns/**             | */**                | */**                | */**            |             | */**       | ns/ns      |

Each cell of the table includes the results for  $\delta^{13}\text{C}$  and  $\delta^{15}\text{N}$  ( $\delta^{13}\text{C}/\delta^{15}\text{N}$ , respectively).

\* $\leq 0.05$ , \*\* $\leq 0.01$ , \*\*\* $\leq 0.001$ ; ns, not significant ( $p > 0.05$ ).
